# Supplementary material for: Glycaemic control in type 2 diabetic patients with chronic kidney disease: the impacts on enzymatic antioxidants and soluble RAGE
Source: PeerJ. 2018 Mar 30;6:e4421. doi: 10.7717/peerj.4421 (PMC5880175; doi:10.7717/peerj.4421)
Supplement: Supplemental Information 1 — The dataset contains the information of 214 study participants including the CKD status, diabetes status, glycaemic control status, demographic characteristics, renal function measurement (eGFR), glutathione peroxidase activity, superoxide dismutase activity and soluble RAGE level. [file peerj-06-4421-s001.xlsx]

## Sheet: Sheet1
CKD status	Diabetes status	Glycaemic control	Age	Gender	Ethnicity	eGFR	CKD stage	GPx	SOD	sRAGE
CKD	D-CKD	GGC	69	Male	Chinese	38.76	3	177.4	13.5	865.8
CKD	D-CKD	GGC	70	Female	Chinese	17.65	4	95.9	14	1113
CKD	D-CKD	GGC	73	Male	Indian	22.59	4	99.3	14.1	1163
CKD	D-CKD	GGC	71	Male	Chinese	39.23	3	129	24	937.4
CKD	D-CKD	GGC	62	Male	Chinese	18.27	4	95.1	19	1087
CKD	D-CKD	PGC	65	Female	Malay	34.43	3	111.2	18.8	561.1
CKD	D-CKD	GGC	60	Male	Chinese	23.07	4	99.3	20.1	973.4
CKD	D-CKD	PGC	66	Male	Malay	33.34	3	94.2	25.9	549
CKD	D-CKD	PGC	71	Male	Chinese	42.98	3	126.5	25.3	624
CKD	D-CKD	GGC	59	Male	Indian	42.2	3	110.4	14.6	266.7
CKD	D-CKD	PGC	54	Female	Malay	24.8	4	111.2	12.3	798.9
CKD	D-CKD	PGC	72	Male	Malay	27.52	4	116.3	16.3	699.7
CKD	D-CKD	PGC	59	Female	Chinese	26.68	4	129.9	14.6	1126
CKD	D-CKD	GGC	63	Male	Chinese	25.16	4	121.4	19.6	954.3
CKD	D-CKD	GGC	68	Female	Chinese	6.67	5	66.2	13.4	2552
CKD	D-CKD	PGC	73	Male	Malay	30.85	3	144.3	14	790.6
CKD	D-CKD	GGC	71	Male	Chinese	29.22	3	137.5	13	540.9
CKD	D-CKD	PGC	54	Female	Malay	41	3	180	13.5	718.2
CKD	D-CKD	PGC	48	Female	Malay	49.61	3	91.7	19.6	311.9
CKD	D-CKD	PGC	71	Male	Malay	29.56	3	95.1	14.8	1037
CKD	D-CKD	GGC	58	Male	Malay	16.44	4	95.1	15.6	1635
CKD	D-CKD	GGC	67	Female	Chinese	29.37	3	129.9	14.8	300.1
CKD	D-CKD	GGC	60	Male	Chinese	26.76	4	91.7	41.1	899.4
CKD	D-CKD	GGC	73	Female	Chinese	16.01	4	98.5	25.6	778.2
CKD	D-CKD	PGC	70	Male	Chinese	33.15	3	90	20.6	749.2
CKD	D-CKD	GGC	73	Male	Chinese	34.21	3	135	14.2	492.6
CKD	D-CKD	PGC	72	Male	Malay	30.19	3	123.1	11.5	530.8
CKD	D-CKD	PGC	59	Male	Indian	16.84	4	115.5	17.5	1957
CKD	D-CKD	PGC	55	Female	Chinese	34.15	3	118	11.9	237.4
CKD	D-CKD	PGC	66	Male	Chinese	34.45	3	93.4	12.7	436.6
CKD	D-CKD	PGC	60	Male	Chinese	37.1	3	94.2	18.6	1103
CKD	D-CKD	GGC	64	Male	Malay	21.1	4	87.4	15.9	5502
CKD	D-CKD	PGC	64	Female	Indian	10.94	5	89.1	17.4	2519
CKD	D-CKD	GGC	74	Male	Chinese	49.43	3	89.1	24.3	805.9
CKD	D-CKD	PGC	57	Male	Malay	21.23	4	86.6	21.1	1426
CKD	D-CKD	PGC	65	Male	Chinese	24.03	4	118.9	11.5	633.7
CKD	D-CKD	PGC	64	Male	Malay	31.89	3	124.8	12.6	1780
CKD	D-CKD	PGC	71	Female	Malay	24.85	4	106.1	14.1	1353
CKD	D-CKD	PGC	59	Male	Chinese	33.67	3	161.3	41.7	866.5
CKD	D-CKD	GGC	66	Female	Chinese	31.34	3	106.1	13.2	4360
CKD	D-CKD	GGC	75	Female	Chinese	15.16	4	117.2	29.1	2327
CKD	D-CKD	PGC	62	Female	Indian	31.49	3	112.1	24.8	1195
CKD	D-CKD	PGC	66	Male	Malay	31.88	3	131.6	25.8	1666
CKD	D-CKD	GGC	64	Male	Chinese	48.64	3	149.4	15.4	1012
CKD	D-CKD	GGC	70	Female	Chinese	29.78	3	118.9	12.2	2156
CKD	D-CKD	GGC	58	Female	Indian	26.78	4	118	19.9	2732
CKD	D-CKD	PGC	64	Male	Malay	43.54	3	106.1	19.3	1289
CKD	D-CKD	GGC	63	Male	Malay	42.64	3	129.9	17.5	934.3
CKD	D-CKD	GGC	65	Female	Malay	35.98	3	124.8	24.5	1015
CKD	D-CKD	PGC	60	Female	Malay	11.95	5	50.1	21.9	507
CKD	D-CKD	PGC	70	Male	Malay	20.63	4	100.2	31.5	519.3
CKD	D-CKD	PGC	65	Female	Chinese	20.62	4	102.7	24	1965
CKD	D-CKD	PGC	71	Female	Indian	20.25	4	73	54.5	960.6
CKD	D-CKD	GGC	62	Female	Malay	18.64	4	98.5	15.7	738.3
CKD	D-CKD	PGC	68	Male	Indian	32.3	3	106.1	23.1	611.2
CKD	D-CKD	GGC	66	Female	Chinese	32.9	3	57.7	15.7	473.7
CKD	D-CKD	PGC	45	Male	Chinese	28.67	4	68.8	19.7	1730
CKD	D-CKD	GGC	72	Male	Malay	39.9	3	67.9	12	1978
CKD	D-CKD	GGC	52	Male	Malay	25.64	4	75.6	42.6	1337
CKD	D-CKD	GGC	56	Female	Indian	7.93	5	88.3	36.3	2183
CKD	D-CKD	PGC	65	Male	Malay	44.12	3	55.2	15.6	575.1
CKD	D-CKD	PGC	64	Male	Chinese	25.34	4	73	12.6	2187
CKD	D-CKD	GGC	71	Male	Chinese	53.31	3	75.6	15.8	313.7
CKD	D-CKD	PGC	72	Male	Indian	28.63	4	84.9	9.6	1068
CKD	D-CKD	PGC	67	Female	Chinese	43.43	3	62	13.2	1849
CKD	D-CKD	PGC	73	Male	Chinese	30.48	3	56	16.9	1440
CKD	D-CKD	PGC	67	Female	Malay	31.75	3	51.8	14.3	1073
CKD	D-CKD	PGC	45	Male	Malay	25.89	4	71.3	14.6	3110
CKD	D-CKD	PGC	59	Male	Malay	33.03	3	59.4	14.6	1773
CKD	D-CKD	PGC	67	Male	Malay	43.13	3	73.9	14.6	467.3
CKD	D-CKD	GGC	61	Female	Malay	23.17	4	60.3	19.1	474.9
CKD	D-CKD	PGC	68	Male	Indian	24.41	4	69.6	17.8	616.4
CKD	D-CKD	GGC	52	Female	Indian	7.58	5	62	41.9	224.8
CKD	D-CKD	PGC	54	Male	Malay	32.8	3	101	16	1086
CKD	D-CKD	GGC	48	Male	Indian	16.09	4	60.3	27.1	1192
CKD	D-CKD	GGC	73	Male	Malay	24.18	4	85.8	64.7	1328
CKD	D-CKD	PGC	65	Male	Indian	16.99	4	81.5	38.5	983
CKD	D-CKD	PGC	49	Male	Indian	20.08	4	66.2	24.6	1732
CKD	D-CKD	PGC	67	Female	Malay	12.81	5	52.6	10.9	2639
CKD	D-CKD	GGC	73	Male	Chinese	27.91	4	73.9	16.9	883.4
CKD	D-CKD	GGC	74	Male	Indian	8.55	5	74.7	30.6	5133
CKD	D-CKD	GGC	67	Male	Malay	38.13	3	67.1	14.8	1662
CKD	D-CKD	GGC	50	Female	Indian	11.8	5	67.9	19.1	4244
CKD	D-CKD	PGC	74	Male	Indian	35.8	3	80.7	57.7	726.1
CKD	D-CKD	PGC	70	Male	Indian	38.07	3	97.6	15.6	2191
CKD	D-CKD	PGC	67	Male	Malay	34.35	3	85.8	21.8	2001
CKD	D-CKD	PGC	66	Female	Chinese	11.34	5	67.1	22.4	5817
CKD	D-CKD	GGC	67	Male	Malay	22.15	4	77.3	8.1	1094
CKD	D-CKD	PGC	61	Female	Malay	31.34	3	96.8	39.3	2625
CKD	D-CKD	GGC	60	Male	Malay	15.17	4	84.9	12.6	4414
CKD	D-CKD	PGC	68	Male	Chinese	19.81	4	109.5	25	879.2
CKD	D-CKD	GGC	66	Male	Chinese	43.62	3	103.6	15.4	621.2
CKD	D-CKD	PGC	63	Male	Malay	22.74	4	77.3	15.2	1338
CKD	D-CKD	PGC	68	Male	Malay	32.09	3	59.4	9.5	1100
CKD	D-CKD	PGC	68	Female	Chinese	20.43	4	60.3	2.3	2490
CKD	D-CKD	GGC	66	Male	Malay	21.62	4	69.6	10.1	1922
CKD	D-CKD	GGC	65	Male	Malay	39.23	3	65.4	17.4	2203
CKD	D-CKD	PGC	54	Male	Indian	19.77	4	75.6	30.1	1850
CKD	D-CKD	PGC	62	Male	Chinese	45.29	3	99.3	18.6	541.8
CKD	D-CKD	GGC	62	Male	Indian	38.46	3	68.8	10.3	1642
CKD	D-CKD	PGC	67	Male	Malay	44.58	3	105.3	15.8	810.7
CKD	D-CKD	PGC	67	Male	Indian	37.59	3	99.3	53.2	886.6
CKD	D-CKD	PGC	54	Male	Indian	16.85	4	82.4	17.1	1134
CKD	D-CKD	PGC	75	Male	Indian	40.19	3	84.1	16.2	2320
CKD	D-CKD	GGC	45	Female	Malay	34.42	3	63.7	10.1	1152
CKD	D-CKD	GGC	69	Male	Indian	28.55	4	64.5	13.7	935.2
CKD	D-CKD	PGC	47	Female	Malay	37.09	3	63.7	11.2	629.6
CKD	D-CKD	GGC	67	Female	Malay	21.31	4	73	16	741.6
CKD	D-CKD	GGC	62	Female	Malay	10.07	5	84.1	14.6	3447
CKD	D-CKD	GGC	67	Male	Malay	4.23	5	99.3	41	6438
CKD	D-CKD	GGC	75	Male	Chinese	29.94	3	119.7	14.5	2010
CKD	D-CKD	GGC	67	Male	Malay	18.7	4	94.2	19.7	1369
CKD	D-CKD	GGC	65	Female	Malay	18.1	4	144.3	17.6	1088
CKD	D-CKD	PGC	67	Male	Malay	14.79	4	123.1	11.2	1936
CKD	D-CKD	GGC	66	Male	Chinese	24.07	4	136.7	29	1190
CKD	D-CKD	PGC	73	Male	Malay	24.67	4	111.2	76.1	2451
CKD	ND-CKD	GGC	66	Male	Malay	20.26	4	150.3	37	2296
CKD	ND-CKD	GGC	67	Female	Chinese	35.13	3	114.6	34.6	675.1
CKD	ND-CKD	GGC	73	Male	Chinese	21.28	4	146	11.8	801
CKD	ND-CKD	GGC	70	Female	Malay	51.06	3	112.1	13.4	194.5
CKD	ND-CKD	GGC	54	Male	Chinese	41.35	3	99.3	13	652.6
CKD	ND-CKD	GGC	50	Male	Malay	16.06	4	143.5	19.7	1102
CKD	ND-CKD	GGC	64	Female	Chinese	49.56	3	109.5	10.5	483.6
CKD	ND-CKD	GGC	69	Male	Indian	17.42	4	101.9	27.7	880.5
CKD	ND-CKD	GGC	66	Male	Malay	26.52	4	57.7	13	882.6
CKD	ND-CKD	GGC	74	Male	Malay	29.32	3	136.7	11	448.6
CKD	ND-CKD	GGC	60	Male	Chinese	32.71	3	112.9	14.1	679.2
CKD	ND-CKD	GGC	41	Female	Malay	35.95	3	103.6	15.3	595.5
CKD	ND-CKD	GGC	58	Male	Malay	47.08	3	88.3	14.5	1140
CKD	ND-CKD	GGC	55	Male	Indian	13.71	5	77.3	21.8	989.6
CKD	ND-CKD	GGC	55	Male	Indian	21.67	4	70.5	33.3	1327
CKD	ND-CKD	GGC	61	Male	Malay	23.65	4	120.6	13	705.4
CKD	ND-CKD	GGC	70	Male	Chinese	22.57	4	138.4	26.8	1421
CKD	ND-CKD	GGC	50	Female	Malay	54.01	3	154.5	28.5	857.5
CKD	ND-CKD	GGC	58	Male	Indian	50.07	3	150.3	10.9	615
CKD	ND-CKD	GGC	68	Male	Chinese	44.08	3	124	14.6	596.3
CKD	ND-CKD	GGC	70	Male	Chinese	10.46	5	85.8	33	1926
CKD	ND-CKD	GGC	67	Female	Malay	20.49	4	55.2	21.9	2253
CKD	ND-CKD	GGC	66	Female	Chinese	57.26	3	67.9	12.4	665.1
CKD	ND-CKD	GGC	49	Female	Chinese	8.96	5	50.1	21.9	740.1
CKD	ND-CKD	GGC	64	Male	Malay	33.33	3	93.4	35.5	2017
CKD	ND-CKD	GGC	64	Female	Indian	53.99	3	75.6	17.8	157.9
CKD	ND-CKD	GGC	55	Male	Chinese	41.51	3	77.3	17.8	1866
CKD	ND-CKD	GGC	63	Male	Chinese	55.71	3	80.7	9.7	896.2
CKD	ND-CKD	GGC	71	Female	Chinese	43.38	3	95.9	13.7	1790
CKD	ND-CKD	GGC	69	Female	Malay	19.61	4	77.3	32.9	861.2
CKD	ND-CKD	GGC	48	Female	Malay	18.08	4	65.4	8.3	2239
CKD	ND-CKD	GGC	67	Male	Malay	19.87	4	67.9	8.8	946.4
CKD	ND-CKD	GGC	59	Male	Chinese	11.32	5	71.3	26.7	1750
CKD	ND-CKD	GGC	61	Male	Chinese	58.42	3	108.7	37.7	603
Non-CKD	DM	PGC	57	Female	Malay	72.42	N/A	106.1	25.9	888
Non-CKD	DM	PGC	71	Male	Indian	74.05	N/A	97.6	23.2	708.4
Non-CKD	DM	GGC	71	Male	Malay	71.24	N/A	87.4	38.2	538.3
Non-CKD	DM	PGC	60	Male	Chinese	129.09	N/A	118.9	25.6	563.4
Non-CKD	DM	GGC	73	Female	Chinese	121.58	N/A	75.6	29.1	378.8
Non-CKD	DM	GGC	74	Female	Indian	80.13	N/A	47.5	25.9	1139
Non-CKD	DM	PGC	71	Female	Chinese	70.39	N/A	73	23.8	448.1
Non-CKD	DM	GGC	64	Male	Chinese	119.96	N/A	67.1	37	482.8
Non-CKD	DM	PGC	68	Female	Indian	133.82	N/A	77.3	27.1	532.8
Non-CKD	DM	GGC	68	Female	Chinese	108.94	N/A	109.5	29.1	902.8
Non-CKD	DM	GGC	72	Female	Chinese	65.89	N/A	101	22.2	463.3
Non-CKD	DM	GGC	45	Male	Malay	65.53	N/A	104.4	34.8	1321
Non-CKD	DM	PGC	59	Female	Indian	112.12	N/A	77.3	14.9	571.8
Non-CKD	DM	PGC	64	Male	Indian	100.13	N/A	91.7	12.8	566.2
Non-CKD	DM	GGC	72	Male	Chinese	76.86	N/A	95.1	54.7	493.9
Non-CKD	DM	PGC	70	Male	Chinese	69.68	N/A	86.6	48.2	481.4
Non-CKD	DM	PGC	56	Male	Indian	112.21	N/A	78.1	27.8	612.4
Non-CKD	DM	GGC	67	Male	Chinese	83.64	N/A	112.1	38.8	535.5
Non-CKD	DM	GGC	71	Male	Chinese	87.7	N/A	75.6	38.2	424.6
Non-CKD	DM	GGC	67	Male	Chinese	74.93	N/A	90	36.5	323.1
Non-CKD	DM	GGC	75	Female	Chinese	75.73	N/A	140.1	31.8	845.4
Non-CKD	DM	PGC	50	Male	Chinese	70.23	N/A	122.3	30	602.6
Non-CKD	DM	PGC	67	Female	Chinese	117.53	N/A	145.2	23.8	1142
Non-CKD	DM	PGC	70	Female	Indian	85.73	N/A	109.5	23.8	463.3
Non-CKD	DM	PGC	66	Male	Chinese	81.54	N/A	123.1	23.5	972.9
Non-CKD	DM	GGC	58	Female	Malay	130.82	N/A	129.9	75.7	722.7
Non-CKD	DM	PGC	72	Male	Chinese	67.6	N/A	114.6	31.8	819.2
Non-CKD	DM	PGC	67	Male	Indian	81.29	N/A	116.3	25.2	395.4
Non-CKD	DM	PGC	75	Male	Indian	75.2	N/A	111.2	22.5	455
Non-CKD	DM	PGC	60	Female	Indian	129.92	N/A	117.2	21.3	309.2
Non-CKD	DM	GGC	57	Female	Malay	76.07	N/A	123.1	74.1	481.4
Non-CKD	DM	GGC	57	Female	Indian	77.36	N/A	102.7	29.5	528.6
Non-CKD	DM	GGC	71	Male	Malay	72.15	N/A	141.8	26.3	923.6
Non-CKD	DM	PGC	59	Male	Malay	89.7	N/A	120.6	24.5	804.7
Non-CKD	DM	PGC	60	Male	Chinese	86.78	N/A	125.7	24.8	380.2
Non-CKD	DM	GGC	63	Female	Chinese	132.18	N/A	96.8	30	991
Non-CKD	DM	PGC	57	Female	Indian	82.96	N/A	70.5	20.7	1702
Non-CKD	DM	GGC	52	Male	Chinese	77.86	N/A	108.7	60.2	427.6
Non-CKD	DM	PGC	50	Female	Indian	146.55	N/A	102.7	22.2	282.6
Non-CKD	DM	PGC	57	Female	Malay	121.45	N/A	107	23.2	249.9
Non-CKD	DM	PGC	60	Female	Indian	76.56	N/A	110.4	24.2	1041
Non-CKD	DM	PGC	61	Female	Indian	140.76	N/A	83.2	33.8	503.7
Non-CKD	DM	PGC	55	Female	Indian	68.54	N/A	114.6	96.5	1263
Non-CKD	DM	PGC	60	Male	Chinese	99.78	N/A	140.1	35.9	1633
Non-CKD	DM	GGC	57	Male	Indian	94.56	N/A	136.7	50	787.6
Non-CKD	DM	GGC	68	Male	Indian	79.92	N/A	138.4	32.7	1029
Non-CKD	Non-DM	GGC	67	Female	Chinese	127.04	N/A	103.6	22.2	673
Non-CKD	Non-DM	GGC	64	Female	Indian	73.08	N/A	90	27.8	297.9
Non-CKD	Non-DM	GGC	73	Female	Chinese	85	N/A	119.7	24.5	1115
Non-CKD	Non-DM	GGC	69	Female	Malay	79.81	N/A	80.7	15.5	420.4
Non-CKD	Non-DM	GGC	63	Male	Malay	76.88	N/A	75.6	19.9	356.6
Non-CKD	Non-DM	GGC	72	Female	Malay	94.24	N/A	98.5	25.6	456.4
Non-CKD	Non-DM	GGC	66	Female	Chinese	92.05	N/A	110.4	26.3	948.9
Non-CKD	Non-DM	GGC	67	Male	Malay	74.93	N/A	131.6	87.2	926.5
Non-CKD	Non-DM	GGC	59	Male	Indian	103.53	N/A	127.4	63.9	443.9
Non-CKD	Non-DM	GGC	64	Male	Indian	113.29	N/A	96.8	32.3	1002
Non-CKD	Non-DM	GGC	53	Female	Malay	94.33	N/A	128.2	19.1	898.3
Non-CKD	Non-DM	GGC	58	Male	Indian	73.3	N/A	115.5	17.8	1052
Non-CKD	Non-DM	GGC	63	Female	Chinese	73.31	N/A	90.8	61.4	662.2
Non-CKD	Non-DM	GGC	54	Female	Chinese	88.66	N/A	112.1	29.5	889.4
Non-CKD	Non-DM	GGC	58	Female	Chinese	112.51	N/A	90.8	22.5	561.6
Non-CKD	Non-DM	GGC	64	Male	Chinese	100.13	N/A	111.2	25.6	576.8
Non-CKD	Non-DM	GGC	65	Female	Malay	92.33	N/A	137.5	37.6	868.9
Non-CKD	Non-DM	GGC	67	Female	Chinese	89.95	N/A	155.4	29.5	572.6
